# Supplementary material for: Early Progression in Non-Small Cell Lung Cancer (NSCLC) with High PD-L1 Treated with Pembrolizumab in First-Line Setting: A Prognostic Scoring System Based on Clinical Features
Source: MDPI journal article supplement (doi:10.3390/cancers13122935), 2021-06-11
Supplement: s1 [file s1]

**Figure S1: Receiver Operating Characteristic (ROC) curve of the model developed**

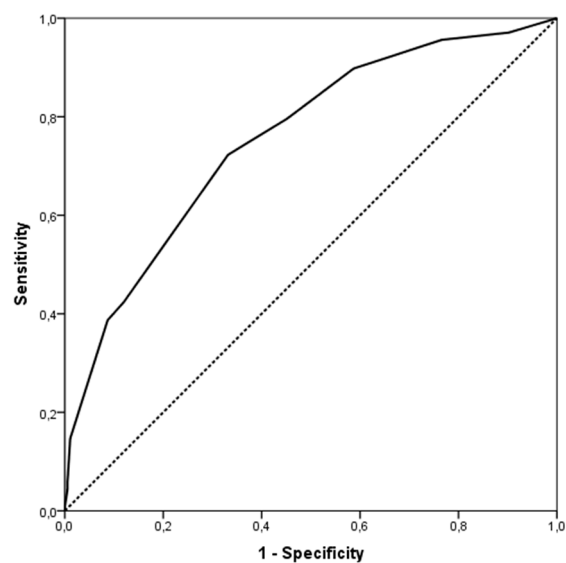

The curve shows the predictive power of the scoring system for early progression (PFS < 3 months).  
The AUC of the model was 0.76 (95% CI: 0.70-0.81).

**Table S1. Beta-coefficients used to build the score system.**

| Clinical characteristics               | beta coefficient (S.E.) |
|----------------------------------------|-------------------------|
| SEX (F vs. M)                          | 0.71 (0.28)             |
| ECOG PS                                |                         |
| (1 vs. 0)                              | 0.57 (0.30)             |
| (2 vs. 0)                              | 1.72 (0.42)             |
| CONCOMITANT STEROIDS (yes vs. no)      | 0.82 (0.26)             |
| NUMBER OF METASTATIC SITES (≥2 vs. ≤1) | 0.78 (0.27)             |
| LIVER METS (yes vs. no)                | 0.82 (0.39)             |
| PLEURAL METS (yes vs. no)              | 0.79 (0.29)             |
|                                        |                         |

S.E. standard error
